# Supplementary material for: Small Regulatory RNAs of Rickettsia conorii
Source: PubMed Central journal article supplement (PMC5105140; doi:10.1038/srep36728), 2016-11-11

## **Small Regulatory RNAs of *Rickettsia conorii***

Hema P. Narra<sup>1</sup>, Casey L. C. Schroeder<sup>1</sup>, Abha Sahni<sup>1</sup>, Mark Rojas<sup>2</sup>, Kamil Khanipov<sup>2</sup>, Yuriy Fofanov<sup>2</sup>, and Sanjeev K. Sahni<sup>1\*</sup>

<sup>1</sup>Department of Pathology, The University of Texas Medical Branch, Galveston, TX, USA 77555.

<sup>2</sup>Department of Pathology, The University of Texas Medical Branch, Galveston, TX, USA 77555.

Supplementary Figures

**Supplementary Figure S1: Read coverage plots of four well-known sRNAs expressed in *R. conorii* during the infection of HMECs *in vitro*.**

The coverage plots of 6S (*ssrS*),  $\alpha$ \_tmRNA (*ssrA*), RNaseP\_bact\_a and *ffs* are shown.

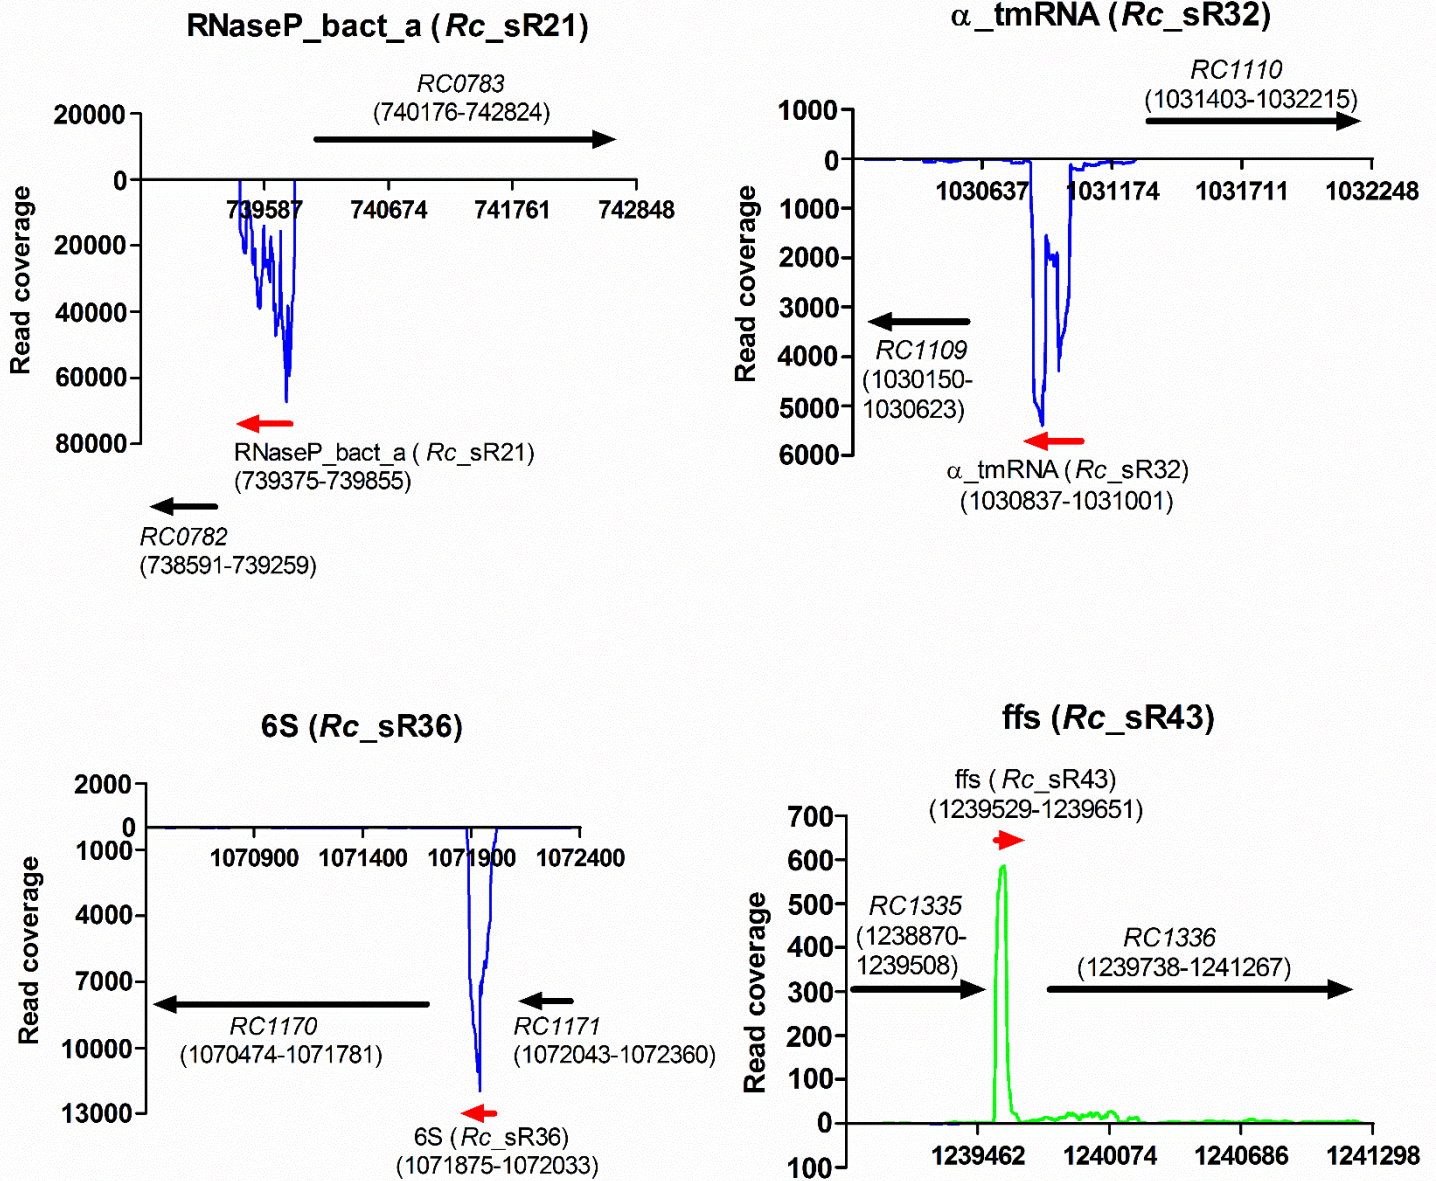

**Supplementary Figure S2: Read coverage plots showing the expression of two novel cis-acting sRNAs namely *Rc\_sR7* and *Rc\_sR34* in *R. conorii* during the infection of HMECs.**

A: coverage plot of cis-acting sRNA *Rc\_sR7*. The cis-ORF (*virB10*) is shown by black arrow and the sRNA is depicted by red arrow. B: coverage plot of cis-acting sRNA *Rc\_sR34*. The cis-ORFs (*RC1121* and *RC1122*) are shown by black arrows and the sRNA is depicted by red arrow.

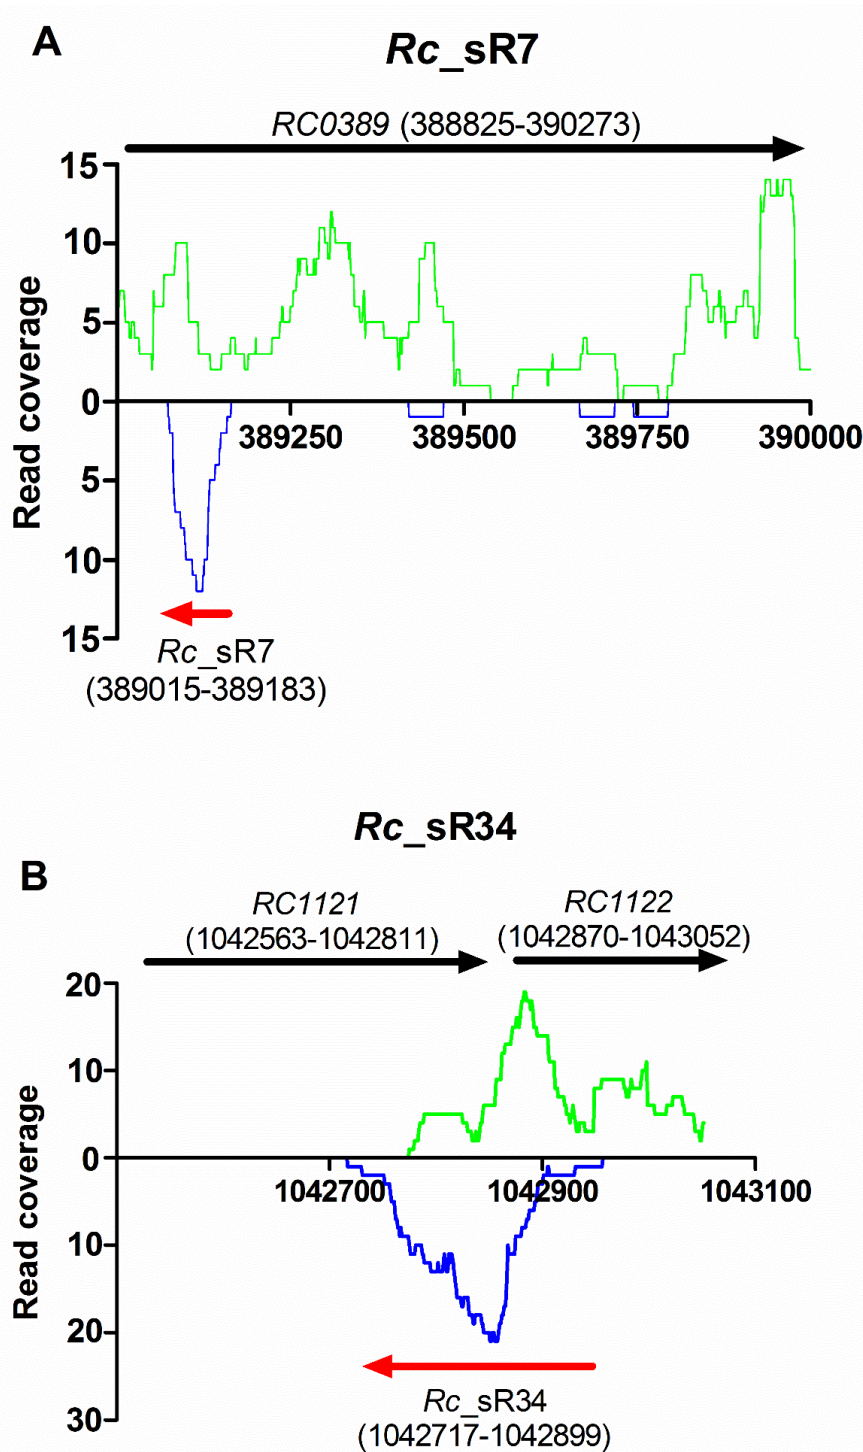

**Supplementary Figure S3: Alignment of *Rc\_sR3* and *Rc\_sR33* expressed in *R. conorii* during the infection of HMECs.**

The genomic sequences of *Rc\_sR3* and *Rc\_sR33* were downloaded from PATRIC and aligned in CLUSTAL Omega. The *Rc\_sR3* and *Rc\_sR33* are expressed in two different genomic locations in the *R. conorii* and share 90% sequence homology.

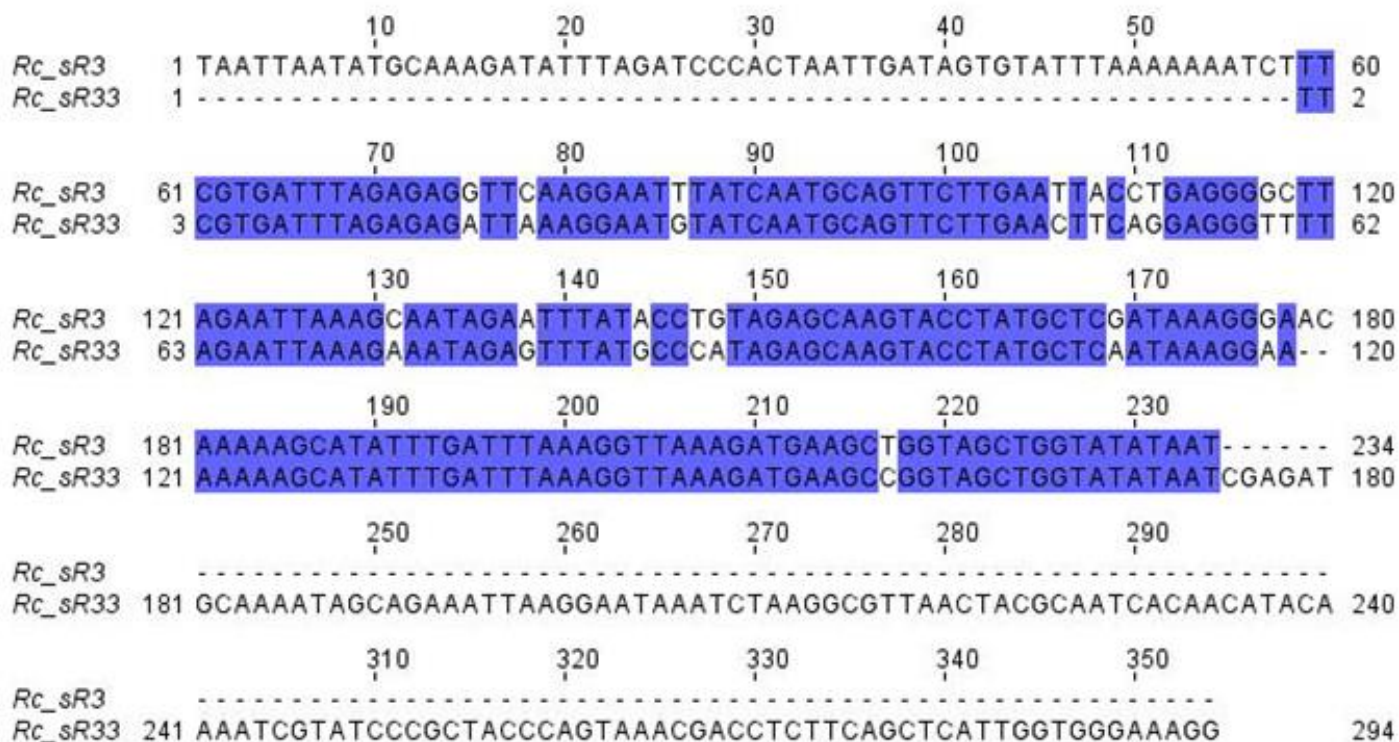

**Supplementary Figure S4: Synteny of *RC1218* and its respective adjacent genes in different rickettsial species.**

The *R. conorii* *RC1218* gene (represented by violet arrow), coding for a hypothetical protein, is identified to transcribe *Rc\_sR38* sRNA on the anti-sense strand of the reading frame. The syntenic mapping revealed that despite being conserved in several rickettsial species, including some strains of *R. prowazekii* and *R. typhi*, *RC1218* is independently lost in some of *R. prowazekii* strains. All *R. prowazekii* and *R. typhi* strains were included, but only a representative strains of *R. rickettsii* (Iowa and Sheila Smith), *R. canadensis* (McKiel) and *R. bellii* (OSU 85) were selected for syntenic mapping.

# Supplementary Figure S4

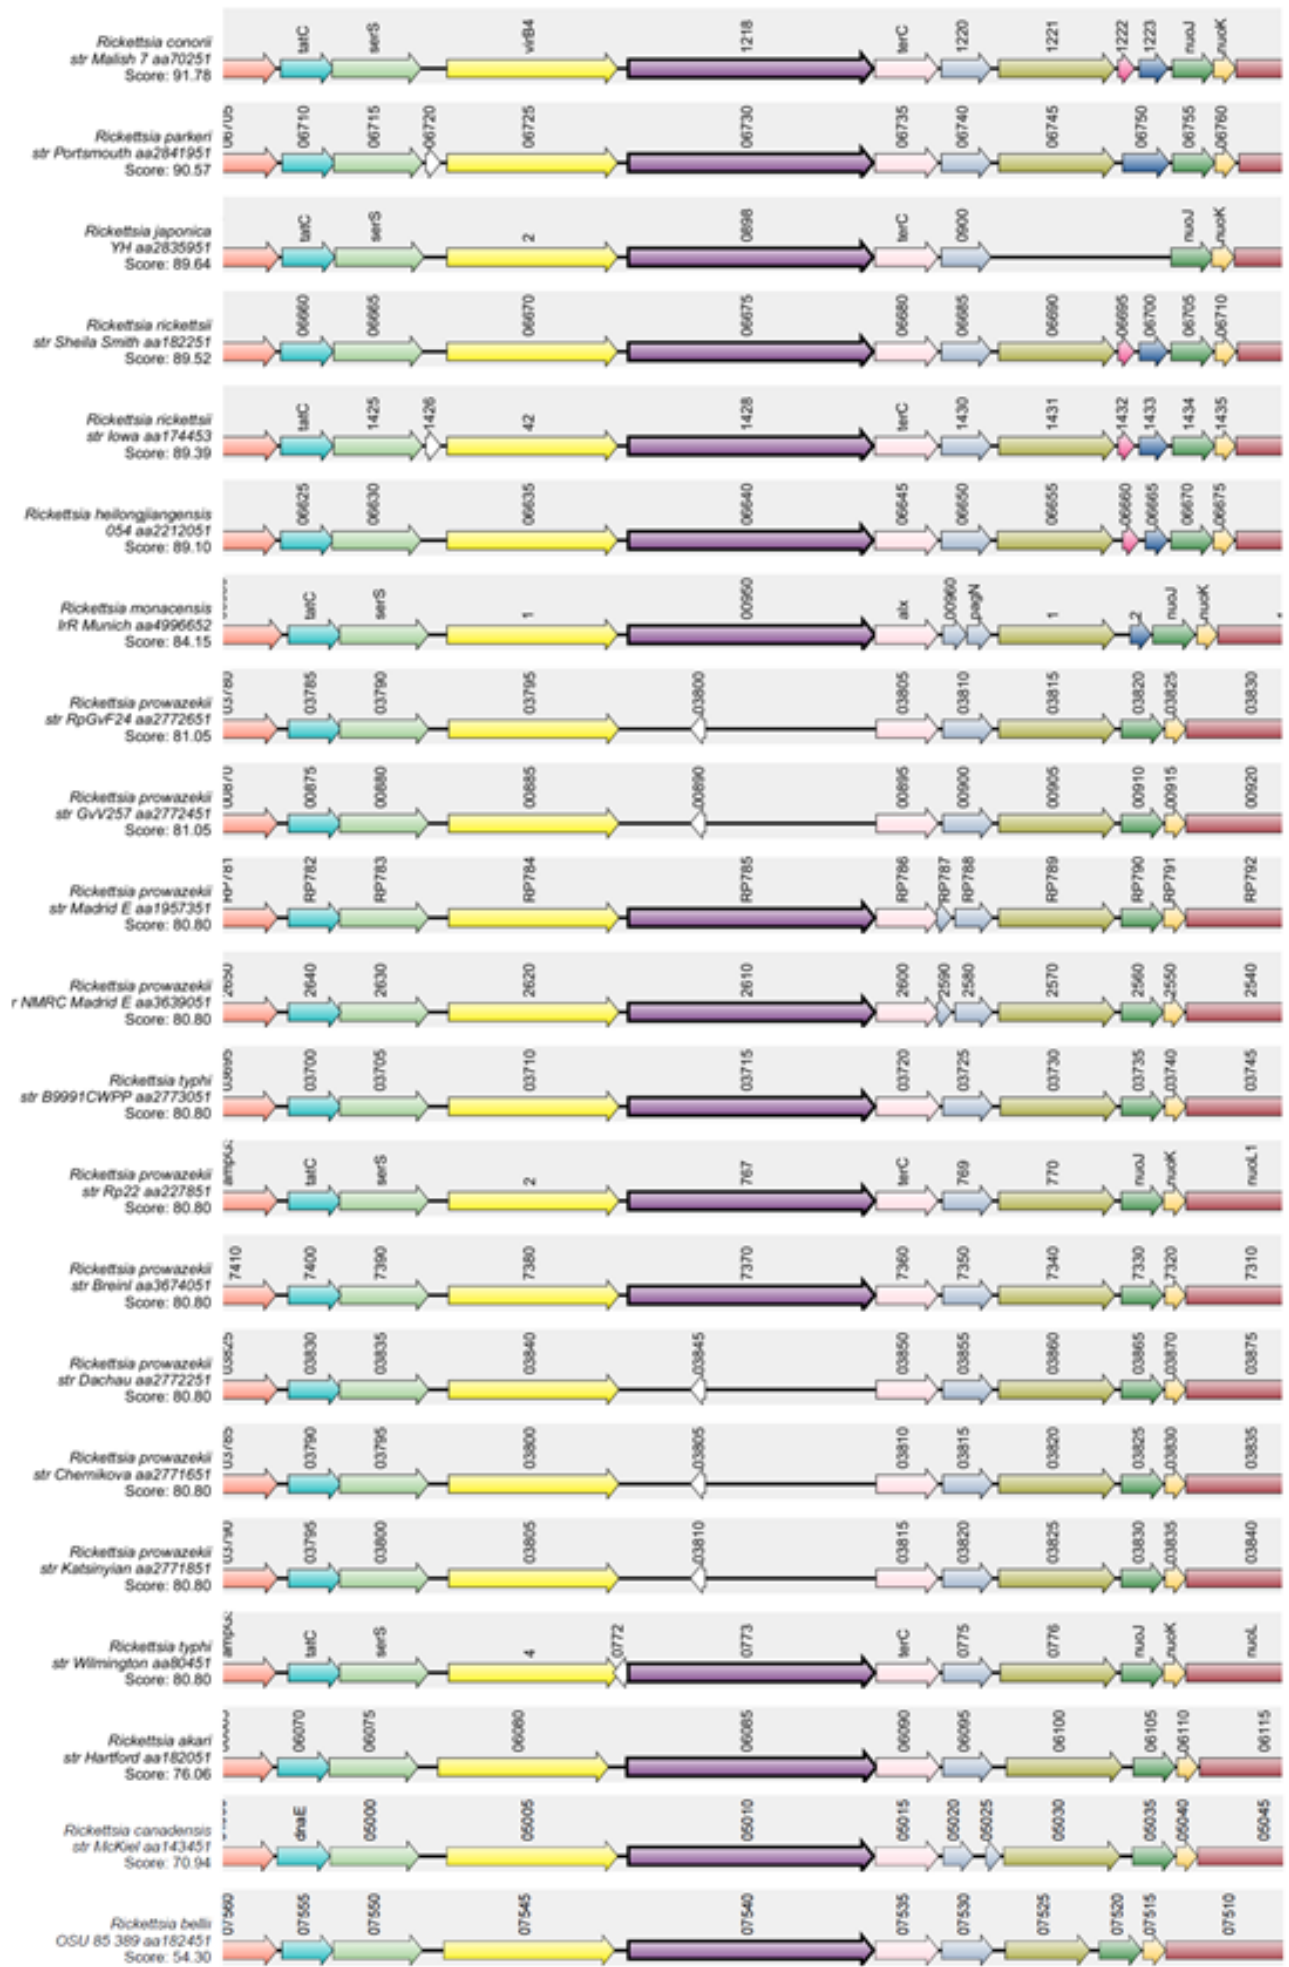

## Supplementary Figure S5: Synteny of RC1121-RC1122 and their respective adjacent genes in different rickettsial species.

The *R. conorii* RC1121 ORF (pink arrow) and RC1122 (blue arrow), coding for hypothetical proteins, are identified to transcribe *Rc\_sR34* sRNA on the anti-sense strand of their reading frame and spanning across their intergenic region. The syntenic mapping of RC1121-1122 revealed that both of these ORFs are unique to *R. conorii* genome (except for *R. slovaca*). Sequence homology of the ORFs to *dnaK* in several other rickettsial genomes was evident and truncated ORFs of *dnaK* were seen in *R. belli* (ancestral group) and *R. akari* (transitional group). Homologous sequences of RC1121-1122 were absent in all *R. prowazekii* strains but found in *R. typhi* strains. The genomic location of *Rc\_sR34* sRNA on *R. conorii* genome is shown by a red arrow.

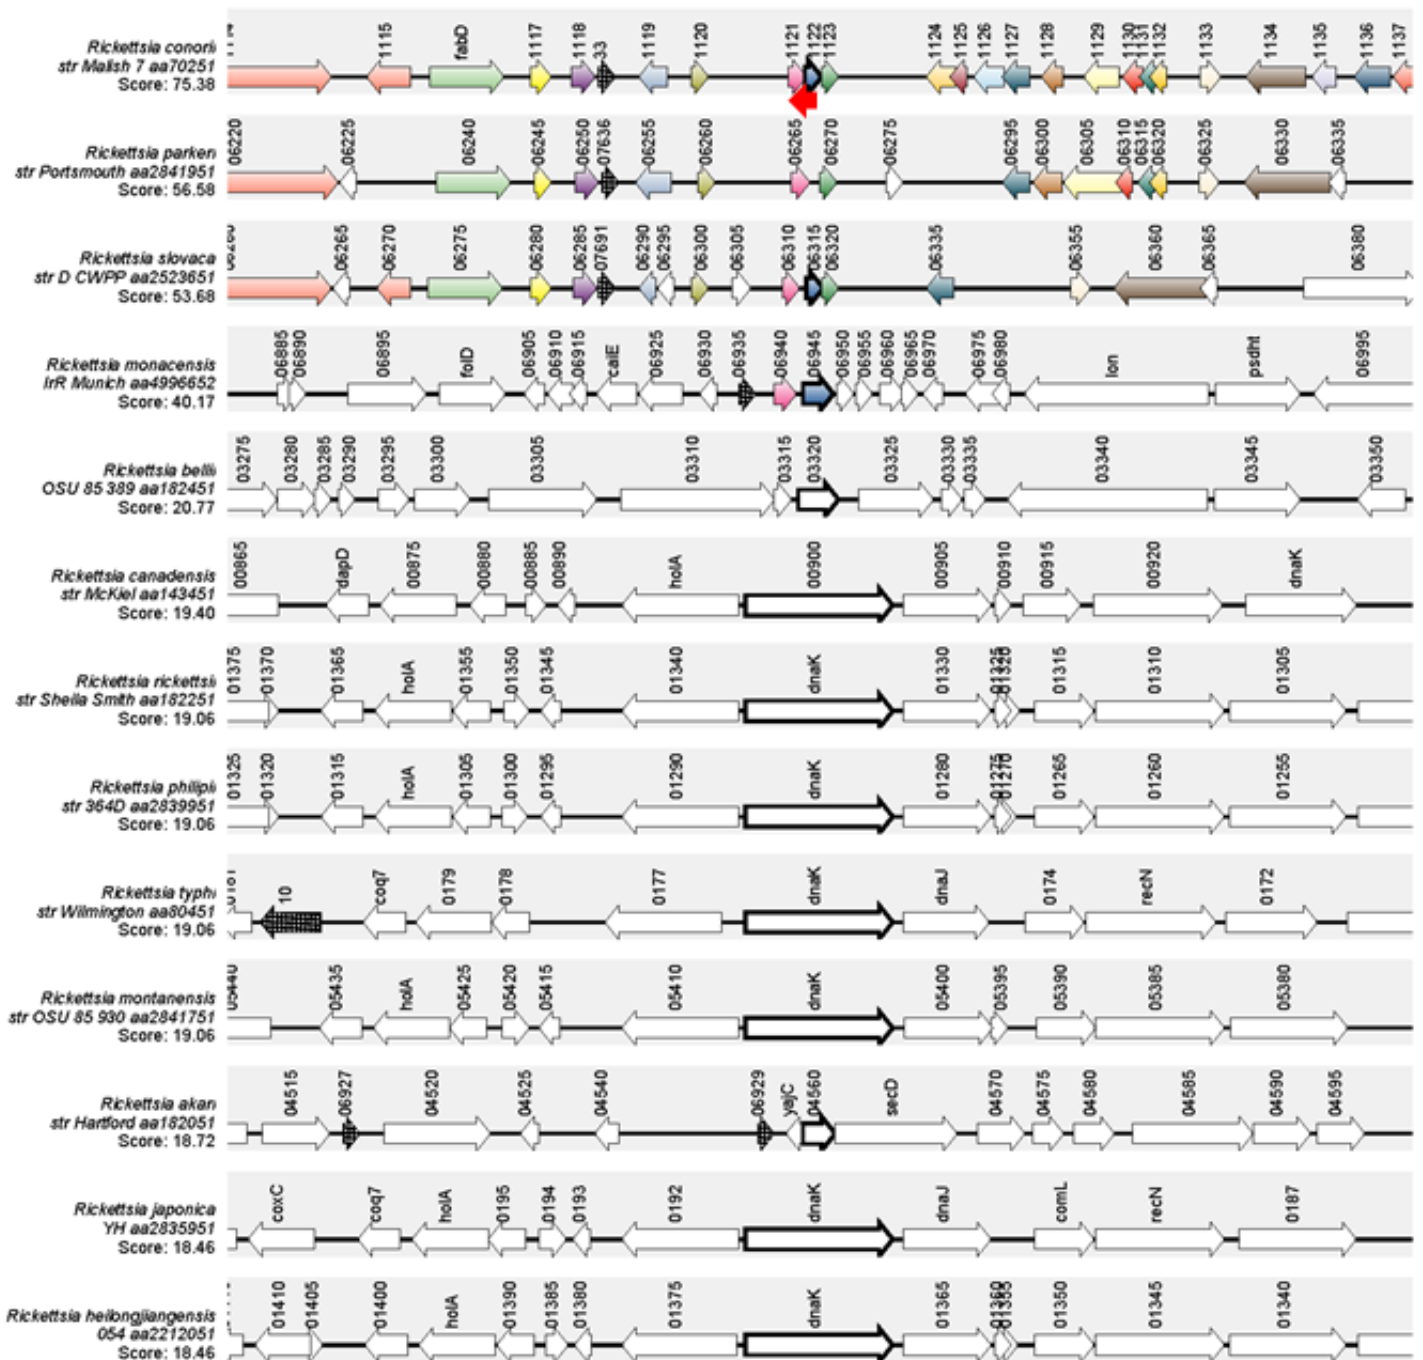

**Supplementary Figure S6: Expression profile of *R. conorii* novel sRNA *Rc\_sR42* and the upstream (*RC1255*) and downstream (*RC1256*) genes adjacent to *Rc\_sR42* during the infection of HMECs *in vitro*.**

The orientation and genomic location of *Rc\_sR42* are shown in the box above and correspond to the PATRIC *R. conorii* genome annotation (PATRIC genome ID: 27944.4). The data from three independent experiments is presented as mean±SEM. Legend: Green: *RC1255*; Red: *Rc\_sR42*; Blue: *RC1256*. \*= p≤0.05, \*\*=p≤0.01 and \*\*\*=p≤0.001.

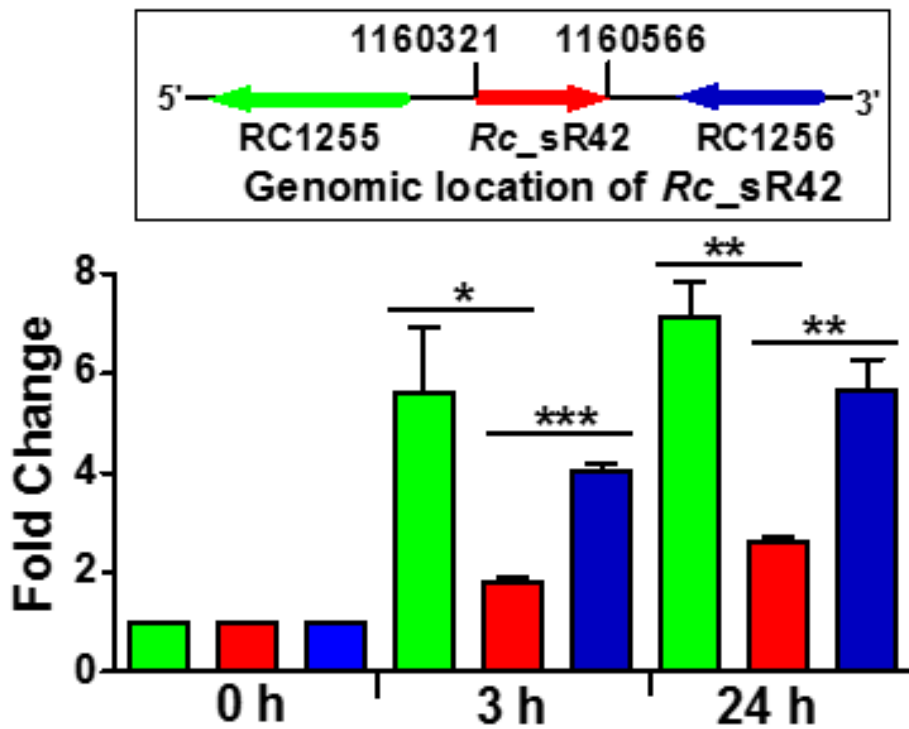



**Supplementary Figure S7: Genomic location of *R. conorii* trans-acting sRNAs *Rc\_sR3* (A) and *Rc\_sR33* (B), and synteny of their respective adjacent genes in different rickettsial species.**

A: Synteny of *Rc\_sR3* and its neighboring genes in different rickettsial species. As shown in the image, the genomic organization both upstream and downstream with respect to *Rc\_sR3* is highly conserved (except for *R. montanensis* and *R. monacensis*) in all rickettsial genomes belonging to spotted fever group. The location and orientation of *Rc\_sR3* sRNA on *R. conorii* genome is shown by a red arrow.

B: Synteny of *Rc\_sR33* and its neighboring genes present in different rickettsial species. While *R. conorii* and *R. parkeri* genomes had conserved synteny, all other rickettsial genomes exhibited diversity in their genome organization both up and downstream of *Rc\_sR33* genomic location. The upstream ORF (*RC1120*), indicated by dark green arrow, was present in only 5 rickettsial genomes (*R. conorii*, *R. parkerii*, *R. slovaca*, *R. montanensis* and *R. monacensis*). The location and orientation of *Rc\_sR33* sRNA on *R. conorii* genome is shown by a red arrow.

# Supplementary Figure S7

## A

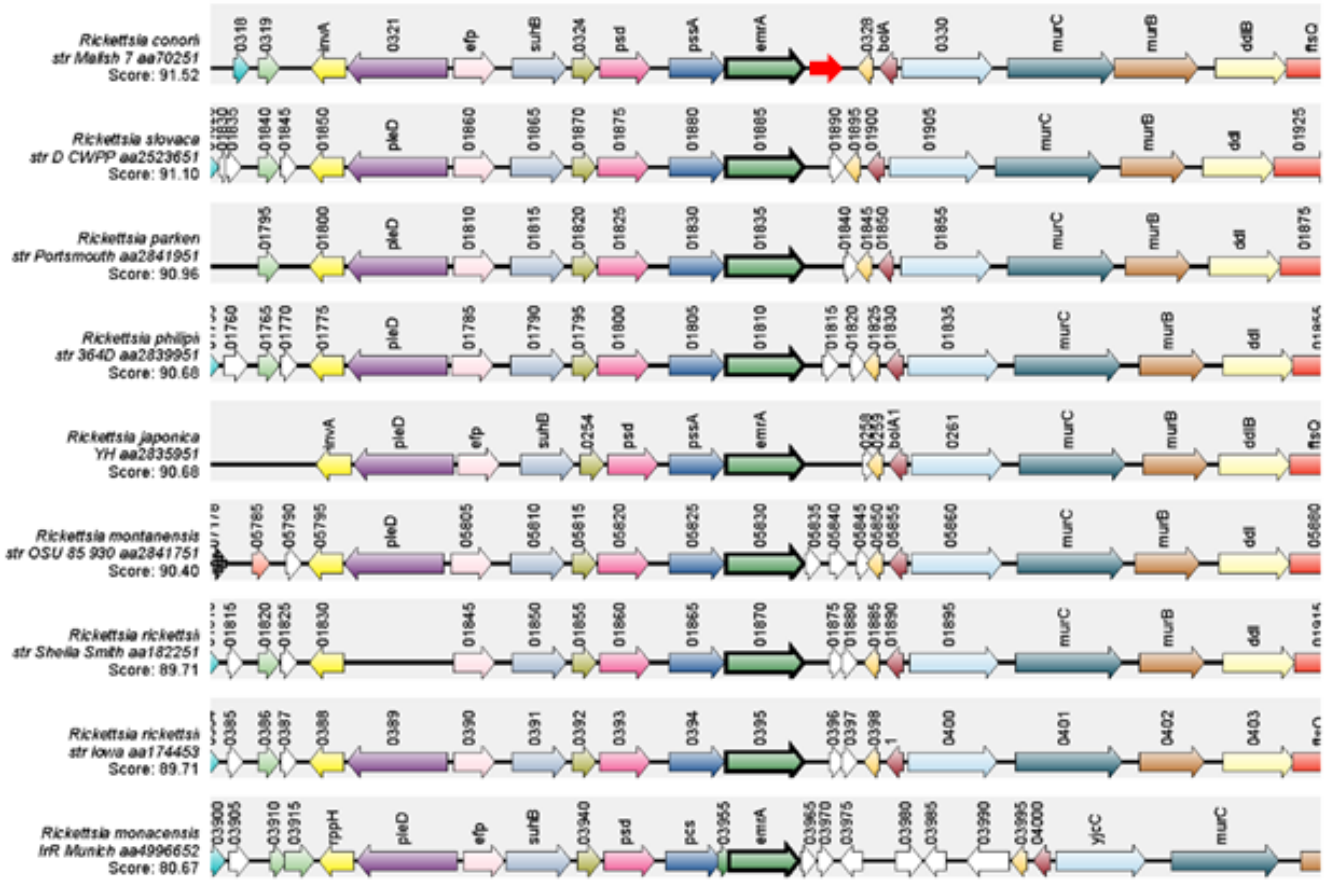

## B

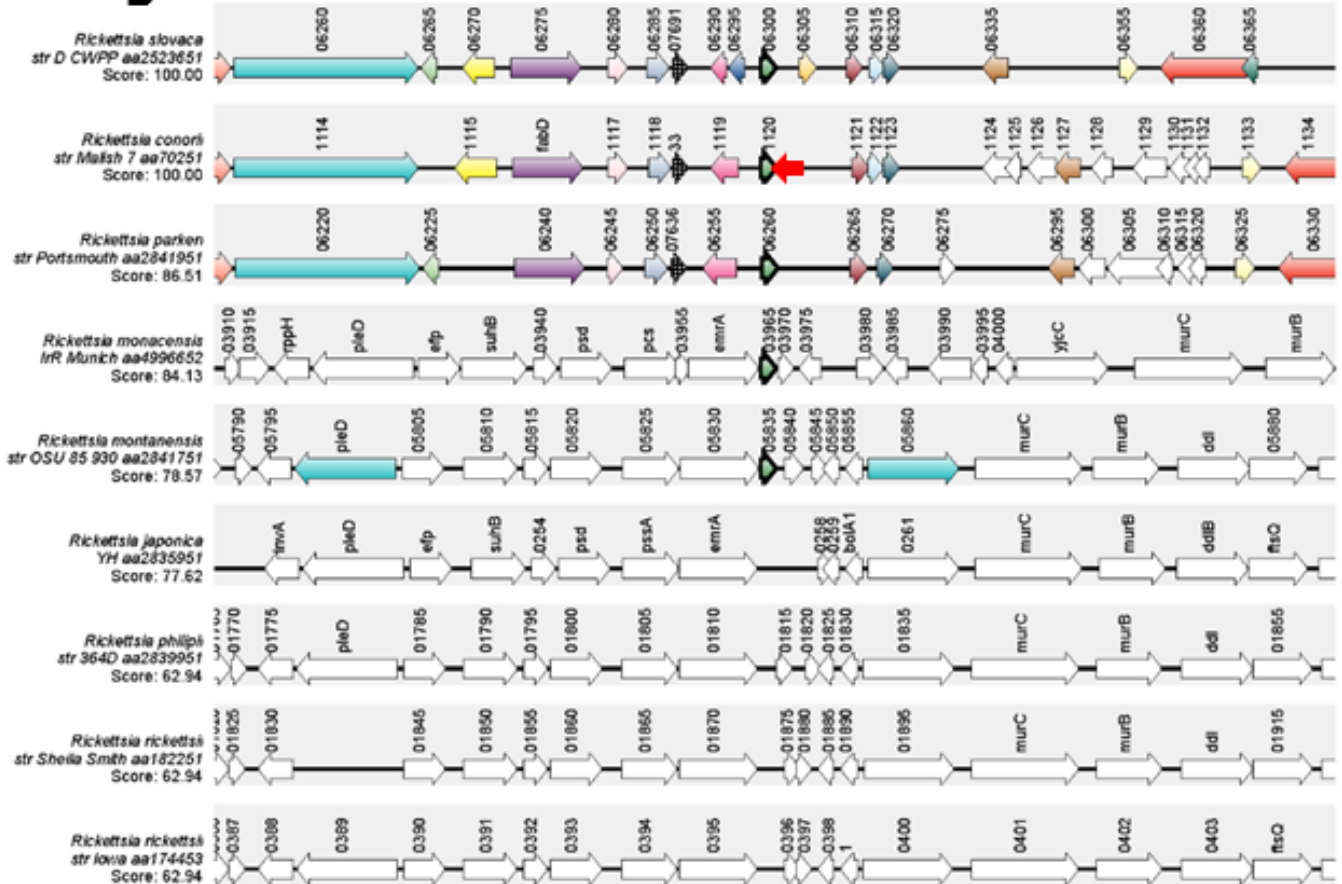

**Supplementary Figure S8: Predicted secondary structure of novel *R. conorii* Rc\_sRs.** The minimum free energy secondary structure of Rc\_sR31, 33, 35, 36 and 42 was determined by RNAfold webserver. The color represents base-pairing probabilities from 0 to 1 (purple to red).

Rc\_sR31

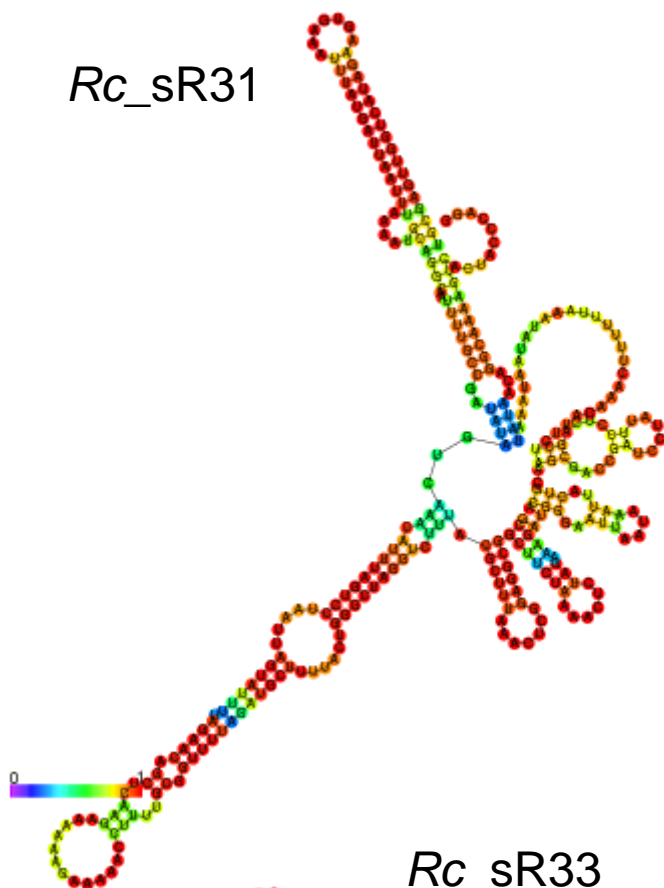

Rc\_sR33

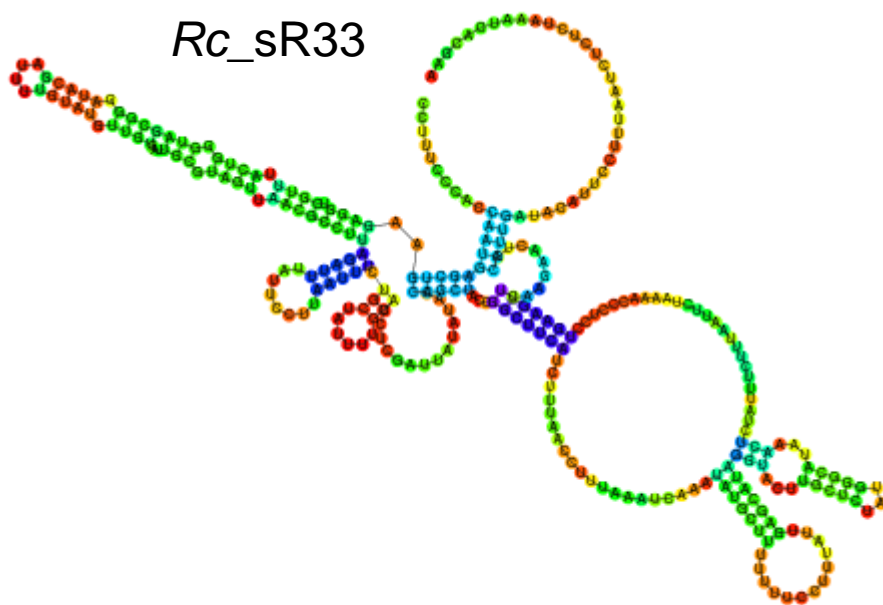

Rc\_sR35

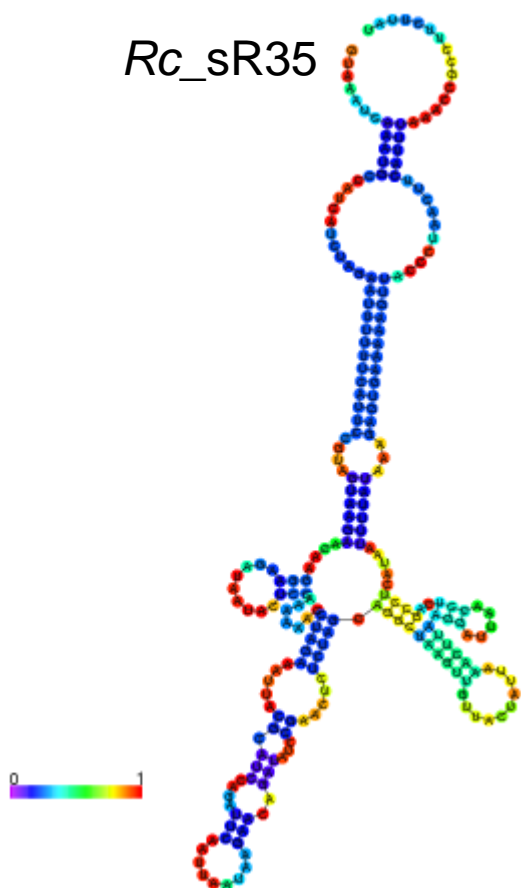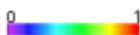

*Rc\_sR36* (6S)

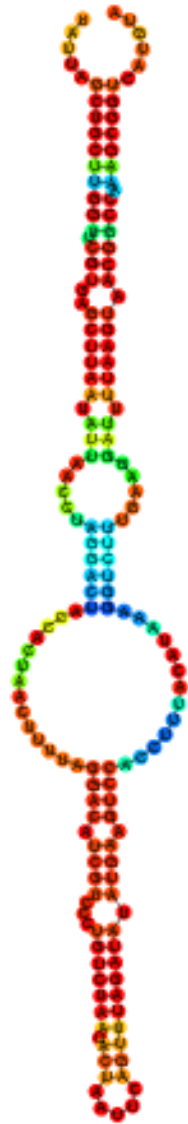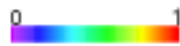

*Rc\_sR42*

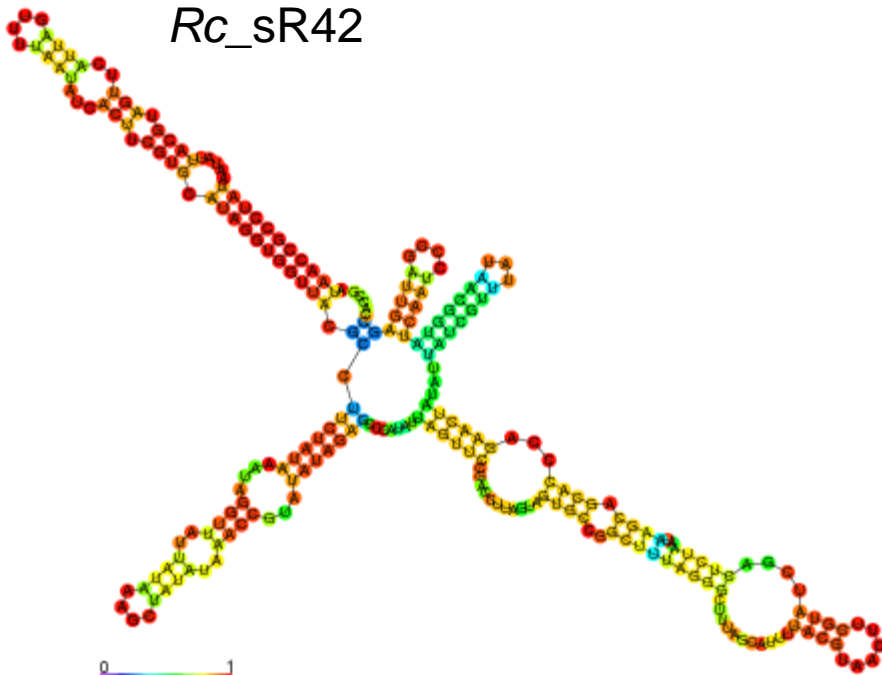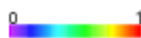

**Supplementary Figure S9: Schematic showing the *RC0288 (cydA)* mRNA fragment used for identification of seed region binding to *Rc\_sR42*.** (a) Schematic bar diagram showing the *cydA-cydB* genes and their orientation in *R. conorii* genome. The gene co-ordinates shown in brackets correspond to RAST annotation of *R. conorii* genome (PATRIC genome ID: 27944.4). The genomic fragment amplified for EMSA studies is shown as black box. (b) Schematic showing different fragments amplified for the identification of seed region by EMSA studies. The location and orientation of primers on the genomic fragment are shown by black arrows. The 'T7 promoter', if present in the primer is shown as green bar. The IntaRNA predicted seed region is shown by green box. The length of each amplicon is shown on the right hand side. The numbers 1-6 on the left side correspond to the fragment used for EMSA studies presented in Figure 6c. All primer sequences are provided in Supplementary Table S2 online.

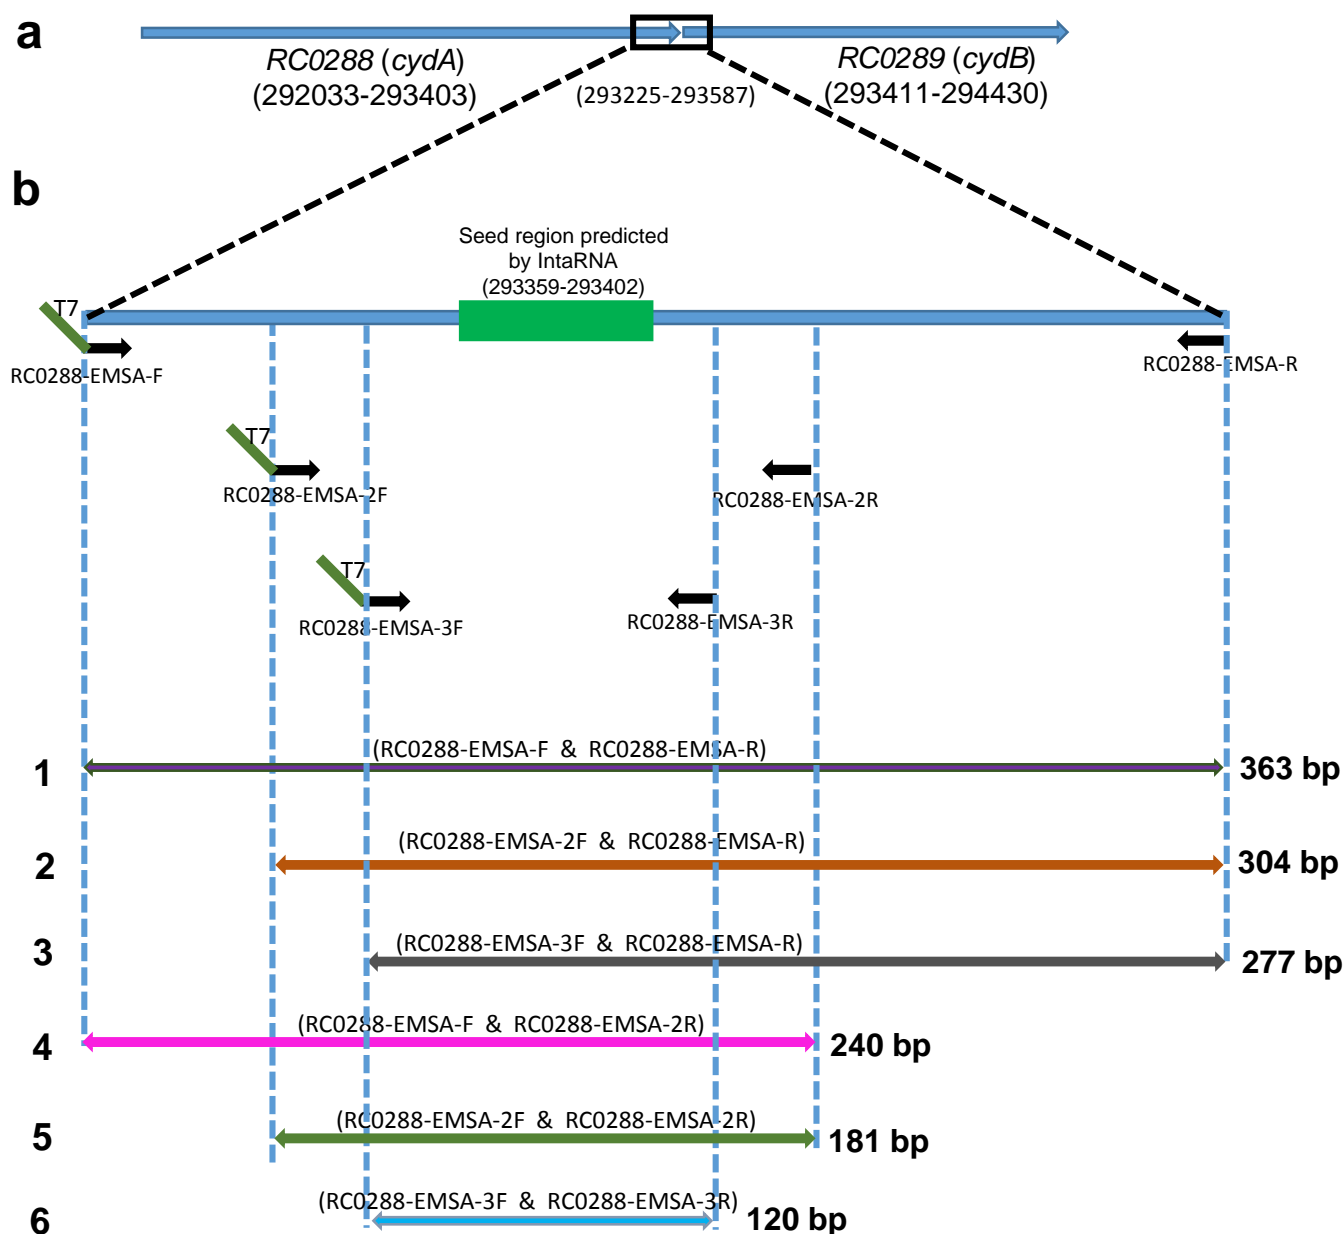

**Supplementary Figure S10: Predicted secondary structure of *R. conorii* riboswitches.**  
The minimum free energy secondary structure of *Rc\_sR3*, 15, 28 and 30 was determined by RNAfold webserver. The color represents base-pairing probabilities from 0 to 1 (purple to red).

*Rc\_sR3*

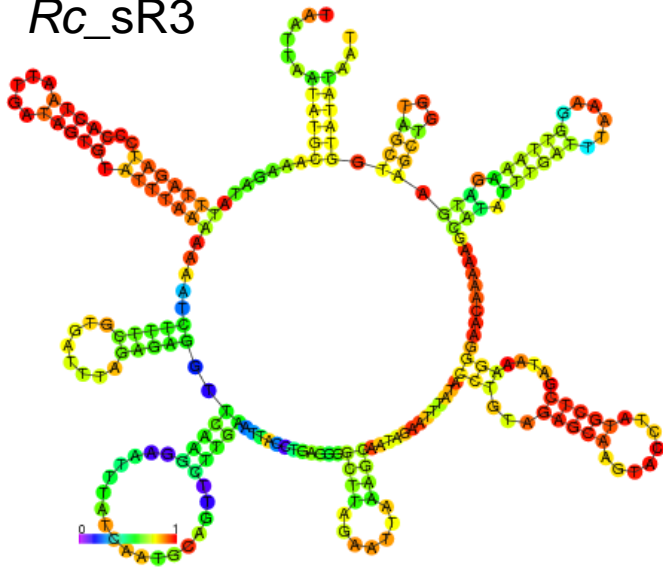

*Rc\_sR15*

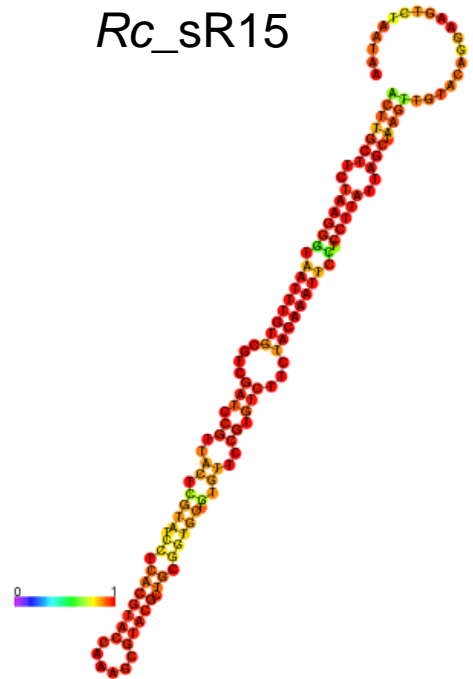

*Rc\_sR28*

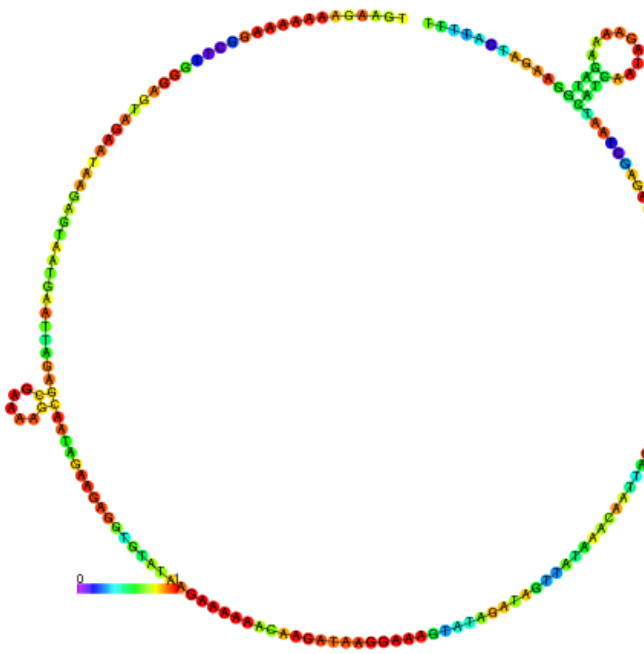

*Rc\_sR30*

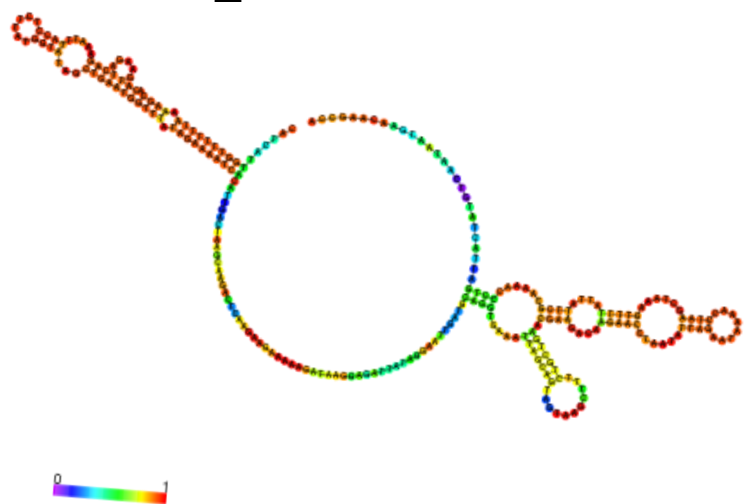

Supplement: srep36728-s1.pdf [file srep36728-s1.pdf]
